# Supplementary material for: Acute Kidney Injury Recovery Patterns in ST-Segment Elevation Myocardial Infarction Patients
Source: MDPI journal article supplement (doi:10.3390/jcm11082169), 2022-04-13
Supplement: s1 [file s1]

## Supplementary

**Table S1.** In-hospital adverse outcomes.

|                        | No AKI <i>n</i> =<br>2688 | AKI<br>Early<br>Recovery<br><i>n</i> = 124 | AKI no<br>recovery<br><i>n</i> = 131 | <i>p</i> Value<br>for No<br>AKI vs<br>AKI<br>Early<br>Recovery | <i>p</i> Value for No<br>AKI vs. AKI No<br>Recover/Delayed<br>Recovery | <i>p</i> Value for AKI<br>Early Recovery<br>vs. AKI co<br>Recovery/Delayed<br>Recovery | <i>p</i> -<br>Value |
|------------------------|---------------------------|--------------------------------------------|--------------------------------------|----------------------------------------------------------------|------------------------------------------------------------------------|----------------------------------------------------------------------------------------|---------------------|
| IABP/inotropes         | 72 (2.7)                  | 16 (12.9)                                  | 38 (29)                              | <0.001                                                         | <0.001                                                                 | 0.002                                                                                  | <0.001              |
| In hospital CABG       | 46 (1.7)                  | 6 (4.8)                                    | 10 (7.6)                             | 0.025                                                          | <0.001                                                                 | 0.443                                                                                  | <0.001              |
| Mechanical ventilation | 83 (3.1)                  | 26 (21)                                    | 37 (28.2)                            | <0.001                                                         | <0.001                                                                 | 0.193                                                                                  | <0.001              |
| VT/VF                  | 185 (6.9)                 | 22 (17.7)                                  | 20 (15.3)                            | <0.001                                                         | <0.001                                                                 | 0.616                                                                                  | <0.001              |
| AF                     | 104 (3.9)                 | 16 (13)                                    | 24 (18.3)                            | <0.001                                                         | <0.001                                                                 | 0.302                                                                                  | <0.001              |
| Stent thrombosis       | 104 (3.9)                 | 9 (7.3)                                    | 7 (5.3)                              | 0.094                                                          | 0.357                                                                  | 0.61                                                                                   | 0.135               |
| Bleeding               | 122 (4.5)                 | 21 (16.9)                                  | 22 (16.8)                            | <0.001                                                         | <0.001                                                                 | 1                                                                                      | <0.001              |
| In hospital mortality  | 45 (1.7)                  | 6 (5.1)                                    | 34 (26.4)                            | 0.019                                                          | <0.001                                                                 | <0.001                                                                                 | <0.001              |

Abbreviations: AKI, acute kidney injury; IABP, intra-aortic balloon pump; CABG, Coronary artery bypass graft surgery; VT, ventricular tachycardia; VF, ventricular fibrillation; AF, atrial fibrillation.
